# Supplementary material
Source: Royal Society of Chemistry journal article supplement (doi:10.1039/d5lc01167a)

**A**

**Fibronectin**

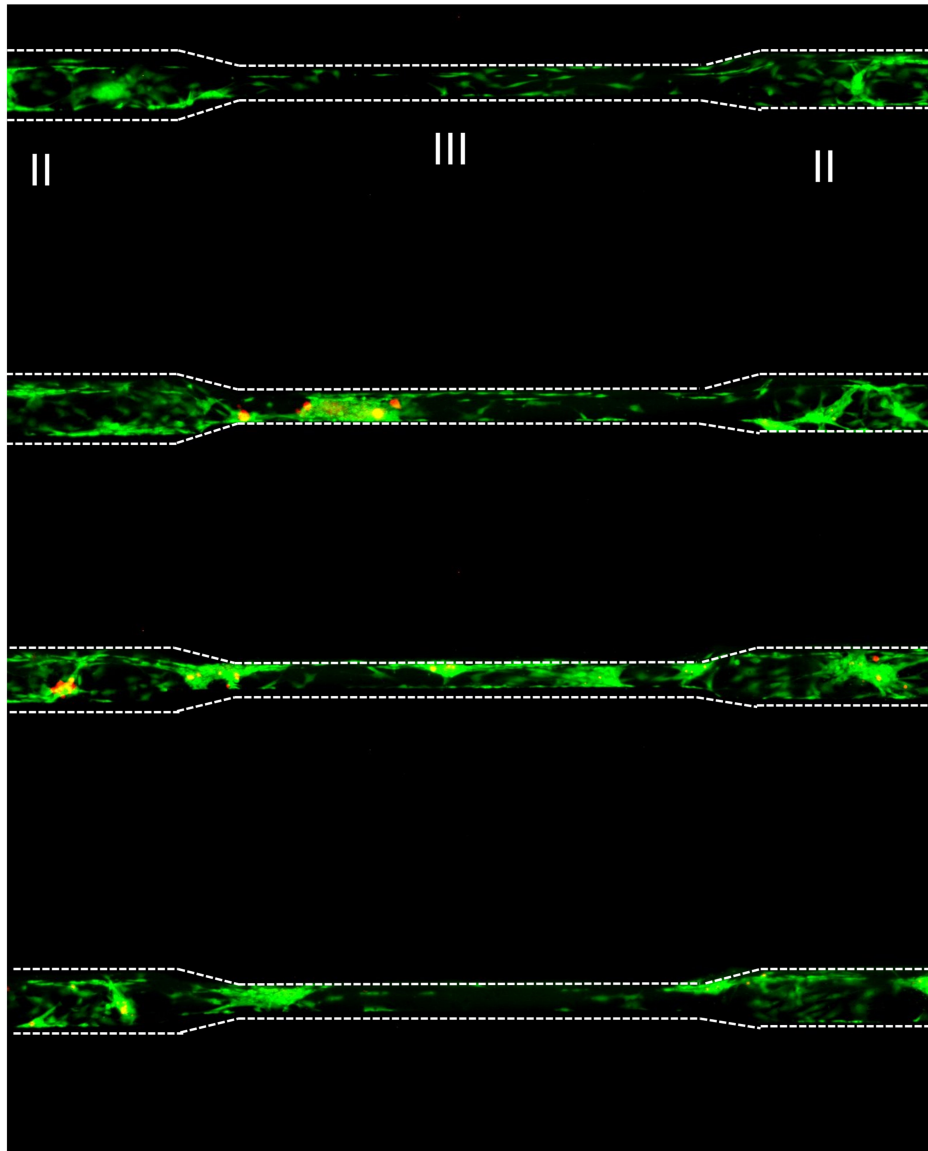

**B**

**Fibronectin +  
collagen IV**

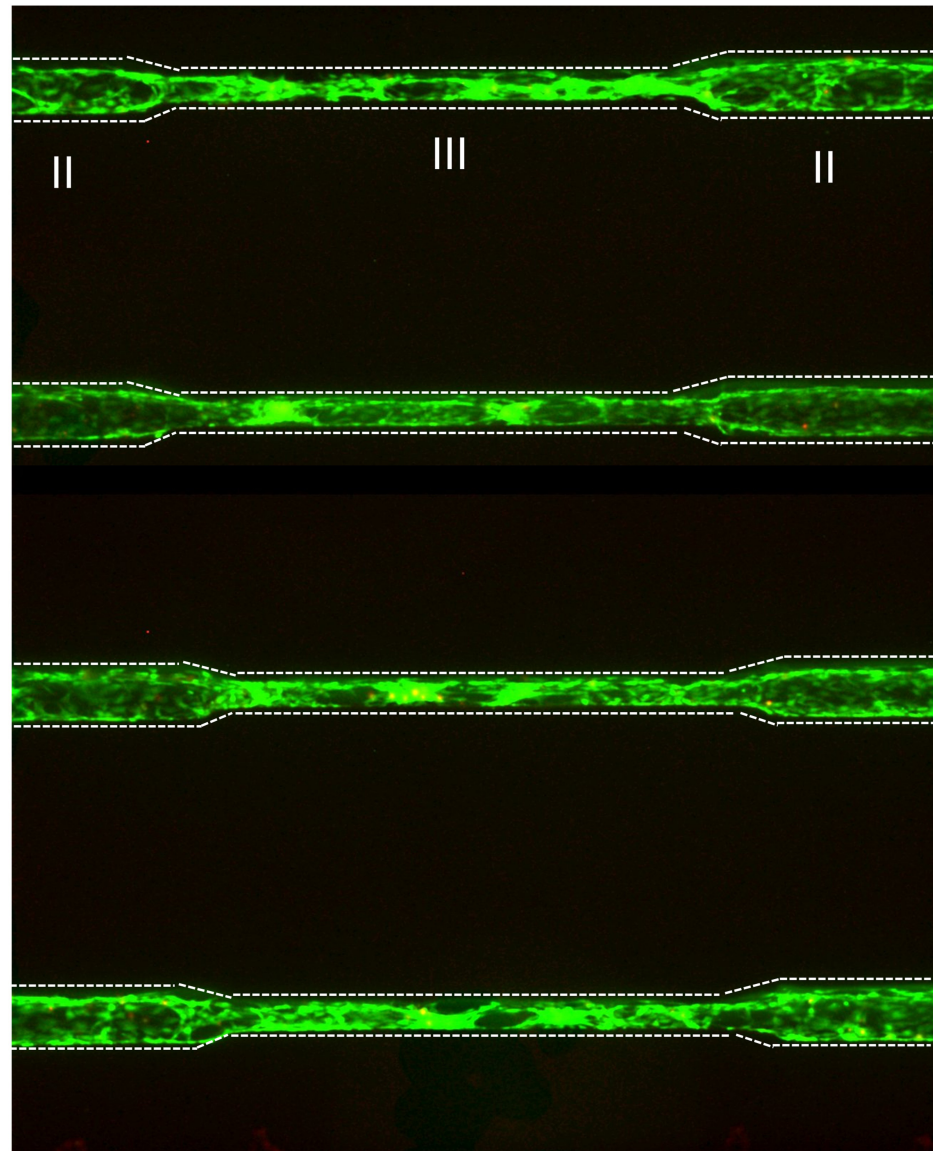

Supplement: d5lc01167a3.pdf [file d5lc01167a3.pdf]

**A** **Fibronectin**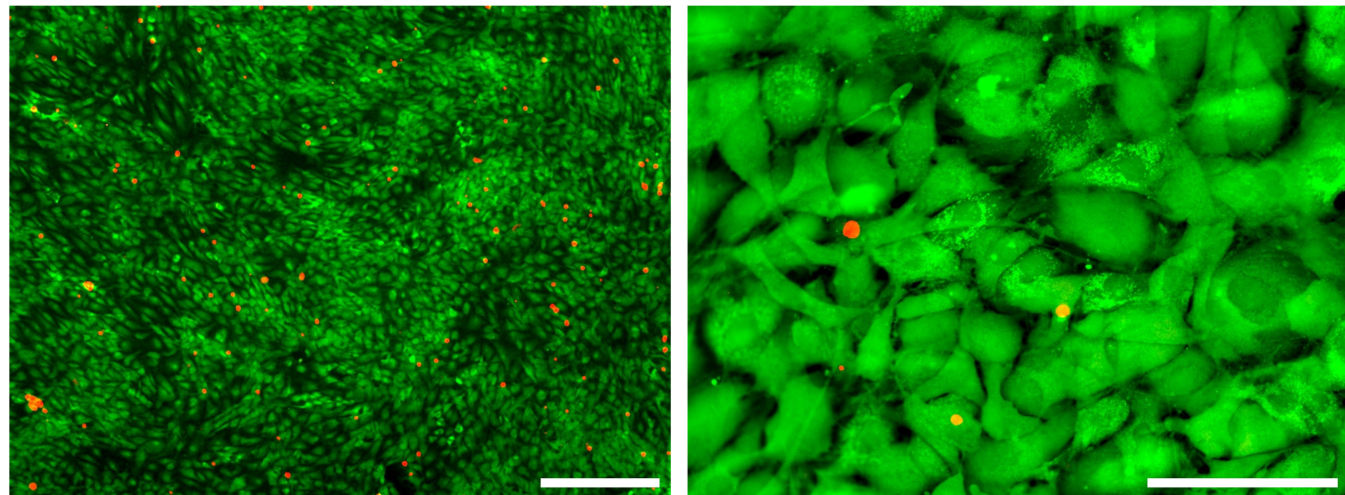**Fibronectin + collagen IV**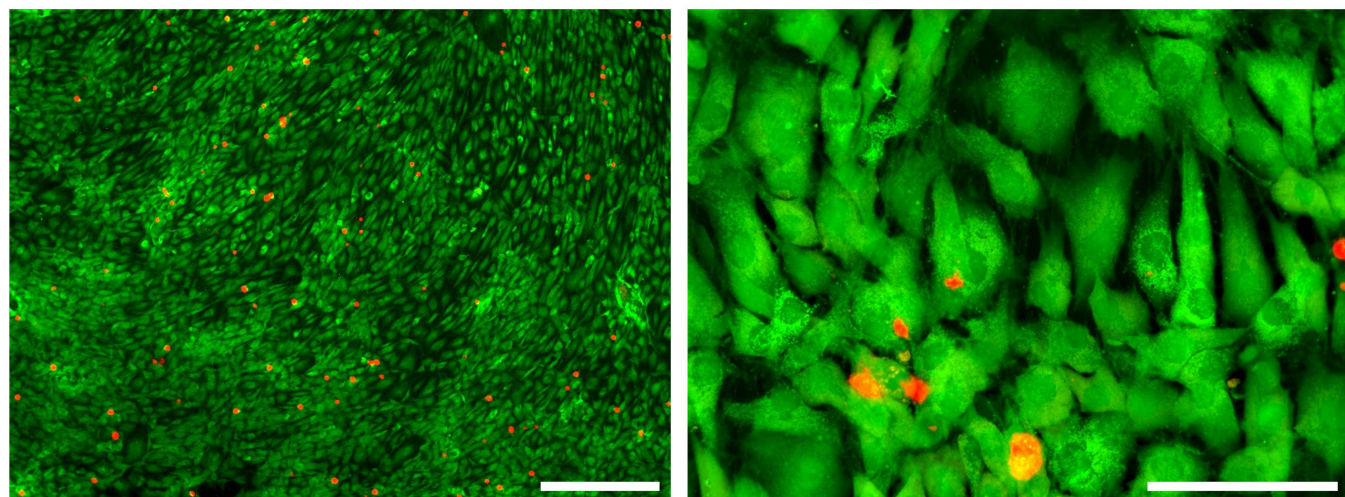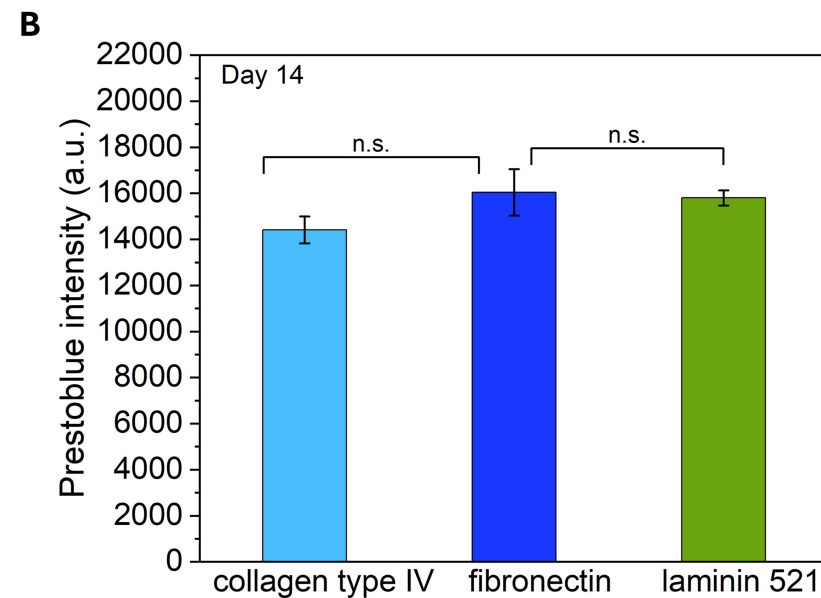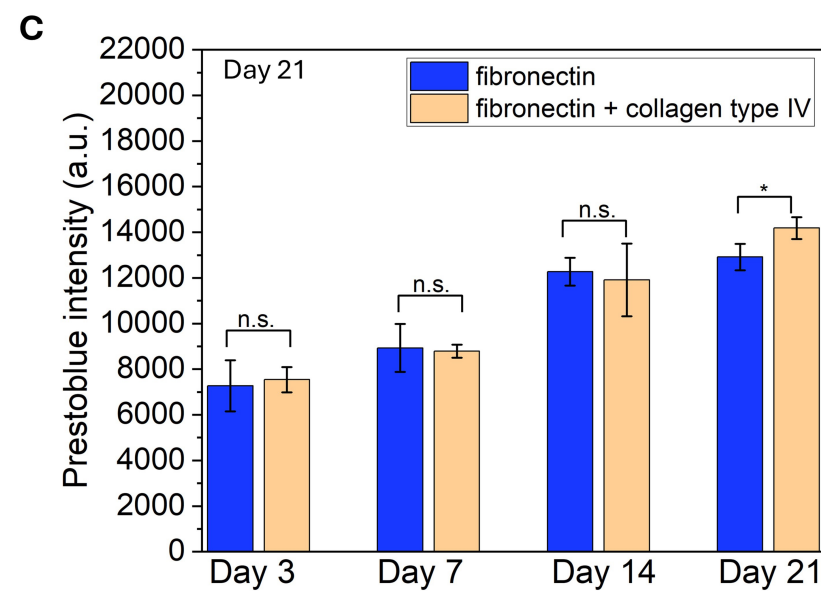

Supplement: d5lc01167a5.pdf [file d5lc01167a5.pdf]

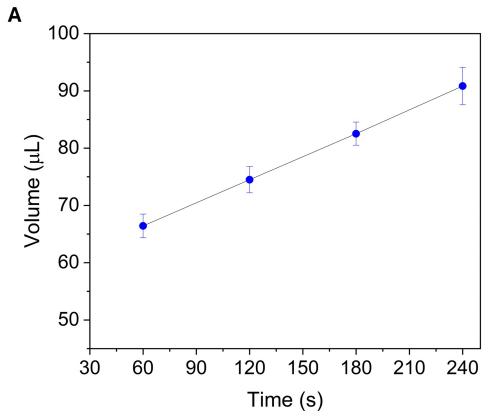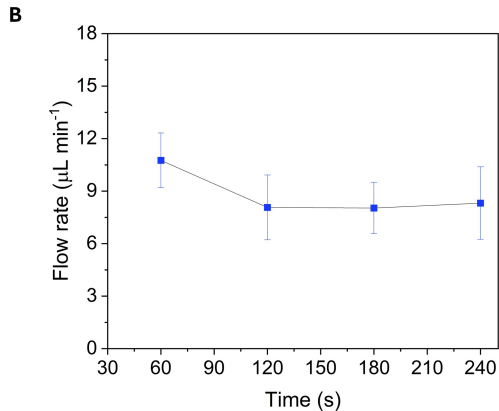

Supplement: d5lc01167a6.pdf [file d5lc01167a6.pdf]

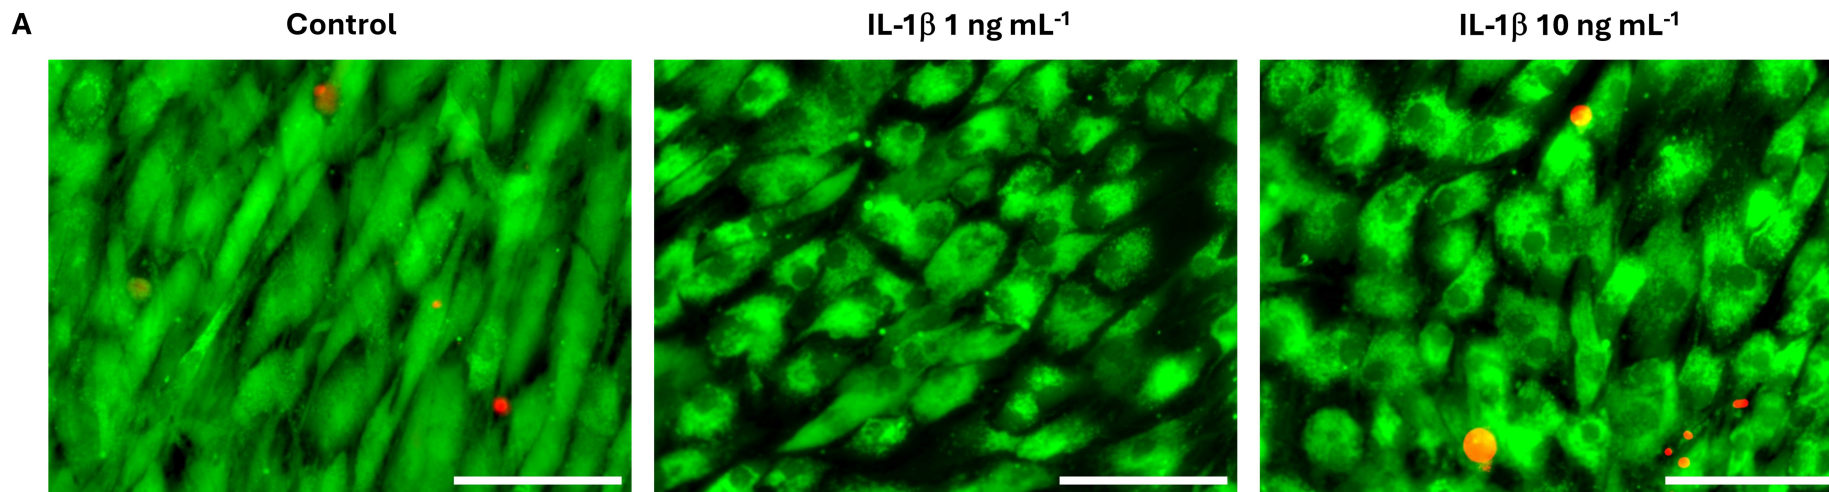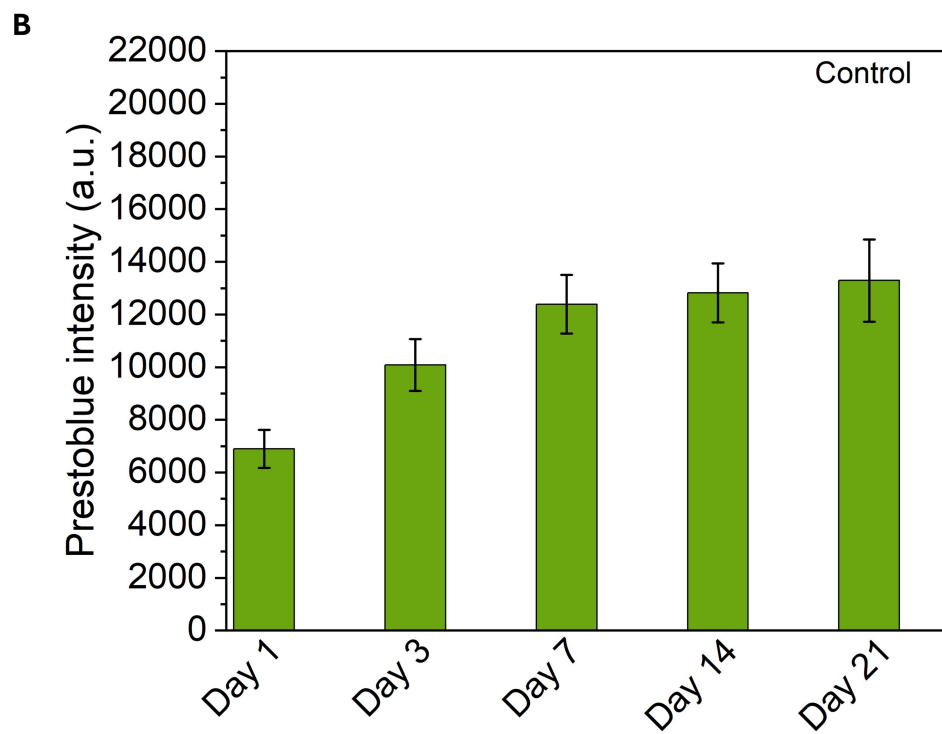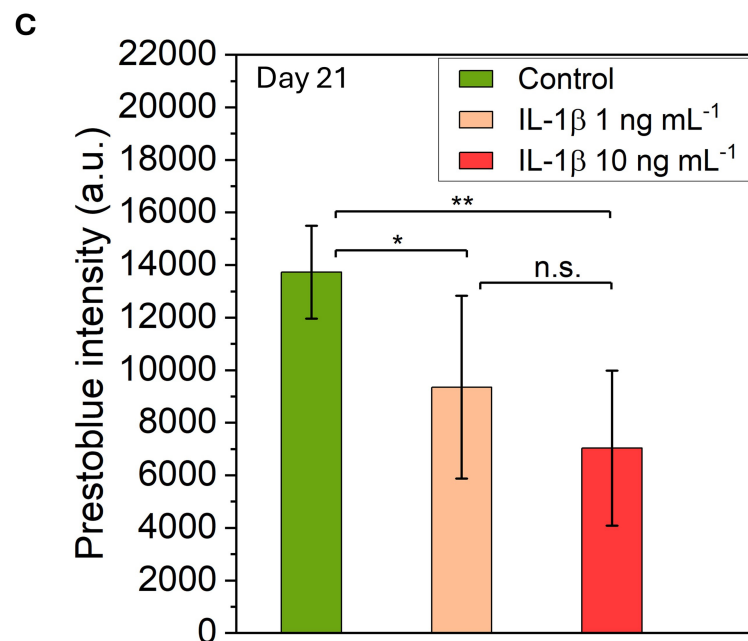

Supplement: d5lc01167a7.pdf [file d5lc01167a7.pdf]

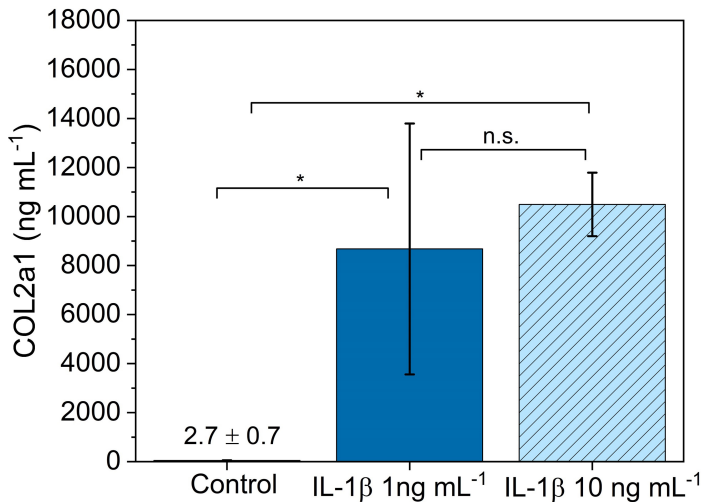

Supplement: d5lc01167a8.pdf [file d5lc01167a8.pdf]
